# Supplementary material for: Object recognition by a heat-resistant core-sheath triboelectric nanogenerator sensor
Source: Royal Society of Chemistry journal article supplement (doi:10.1039/d2ta03422k), 2022-01-01
Supplement: d2ta03422k5.pdf [file d2ta03422k5.pdf]

# Supporting Information

## Object recognition by a heat-resistant core-sheath triboelectric nanogenerator sensor

Xiaodi Zhong <sup>a, b</sup>, Ping Sun <sup>a</sup>, Ruichao Wei <sup>c, d</sup>, Haoran Dong <sup>a, b</sup> and Saihua Jiang <sup>a, b, \*</sup>

<sup>a</sup> Institute of Safety Science and Engineering, School of Mechanical and Automotive Engineering, South China University of Technology, Wushan Road 381, Guangzhou 510641, P. R. China.

<sup>b</sup> Guangdong Provincial Key Laboratory of Technique and Equipment for Macromolecular Advanced Manufacturing, South China University of Technology, Guangzhou, 510641, P. R.

China

<sup>c</sup> Research Institute of New Energy Vehicle Technology, Shenzhen Polytechnic, Shenzhen,

Guangdong 518055, P. R China

<sup>d</sup> School of Automobile and Transportation, Shenzhen Polytechnic, Shenzhen, Guangdong 518055,

P. R China

**Corresponding author:**

\*E-mail: meshjiang@scut.edu.cn (S.H. Jiang)

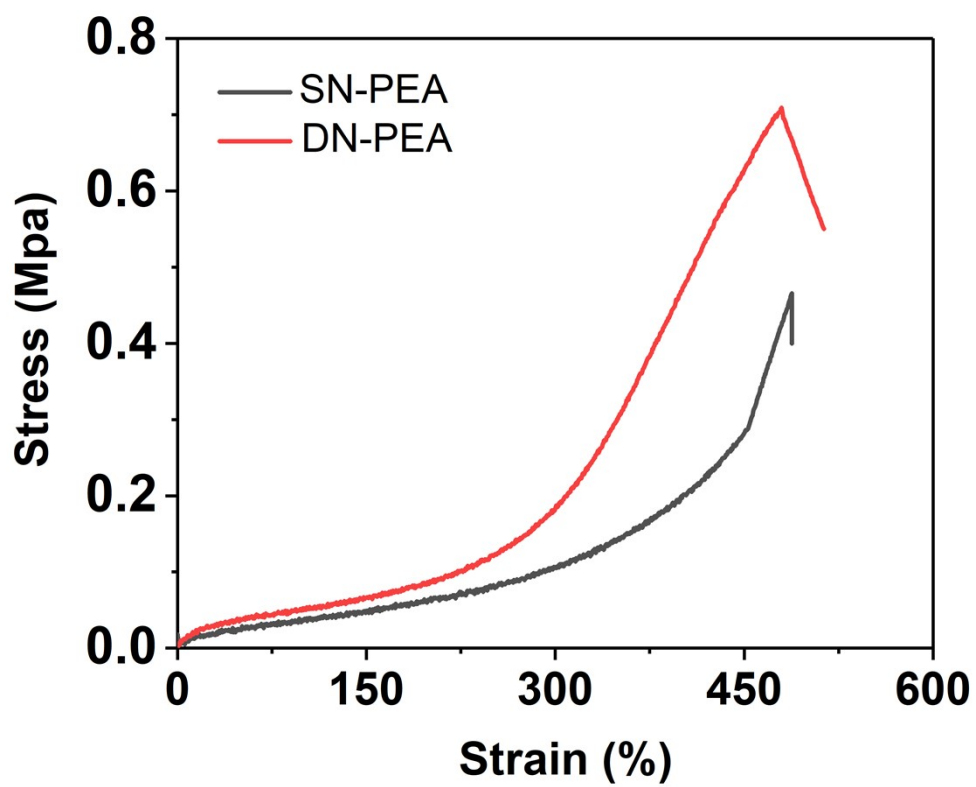

**Fig. S1** Stress-strain curve of the single network elastomer (SN-PEA) and the double network elastomer (DN-PEA). The DN-PEA has higher tensile strength.

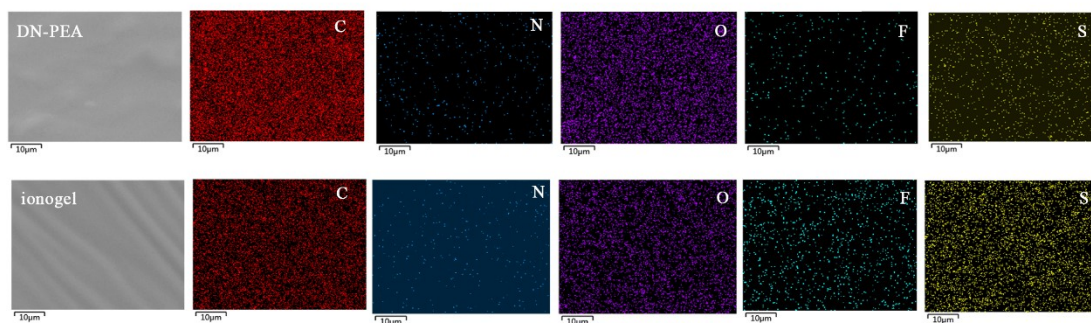

(i)

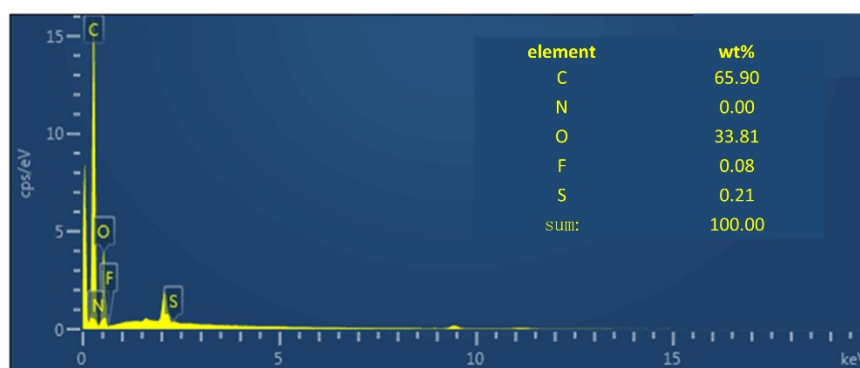

(ii)

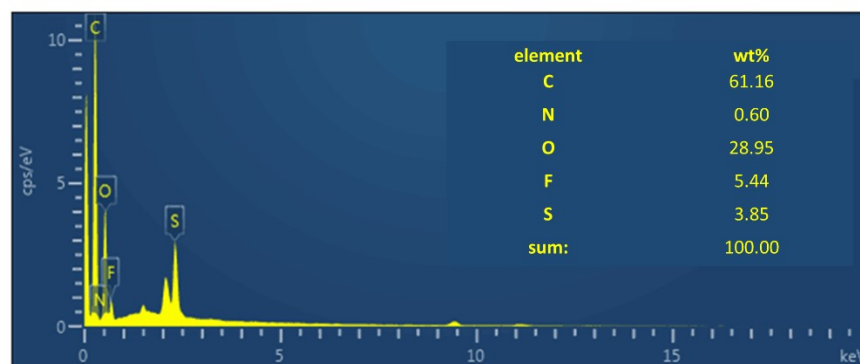

(iii)

**Fig. S2** (i) EDS images of DN-PEA and the ionogel, (ii) Element content diagram of DN-PEA, (iii) Element content diagram of ionogel.

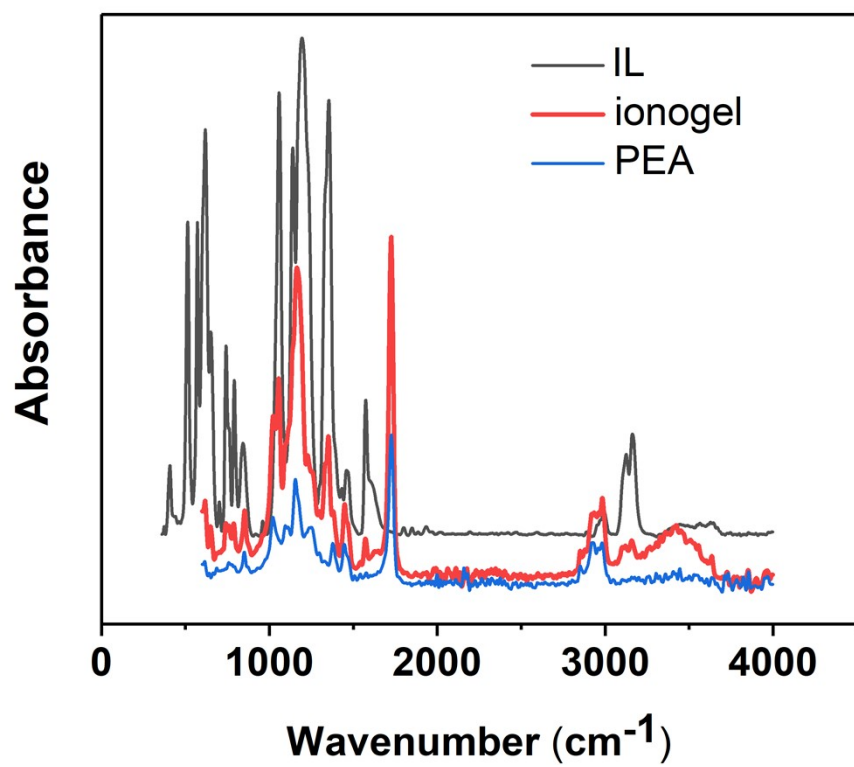

Fig. S3 ATR-FTIR spectra of ionic liquid (IL), ionogel and DN-PEA.

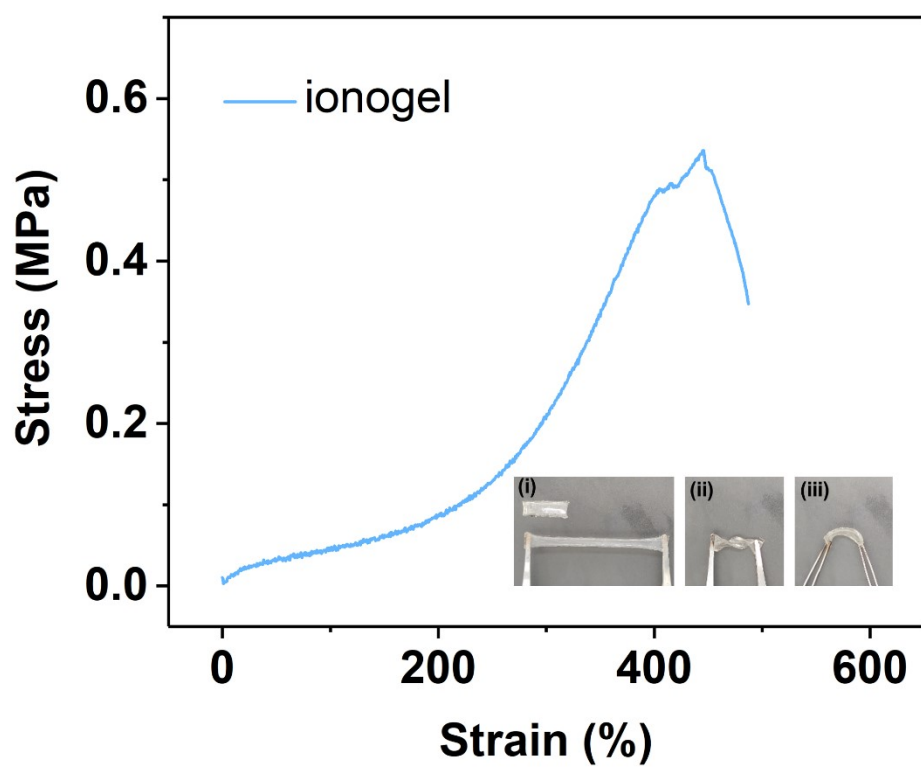

**Fig. S4** Stress-strain curve of the ionogel. Inset: the ionogel has good mechanical properties and can be stretched (i), twisted (ii) and bended (iii).

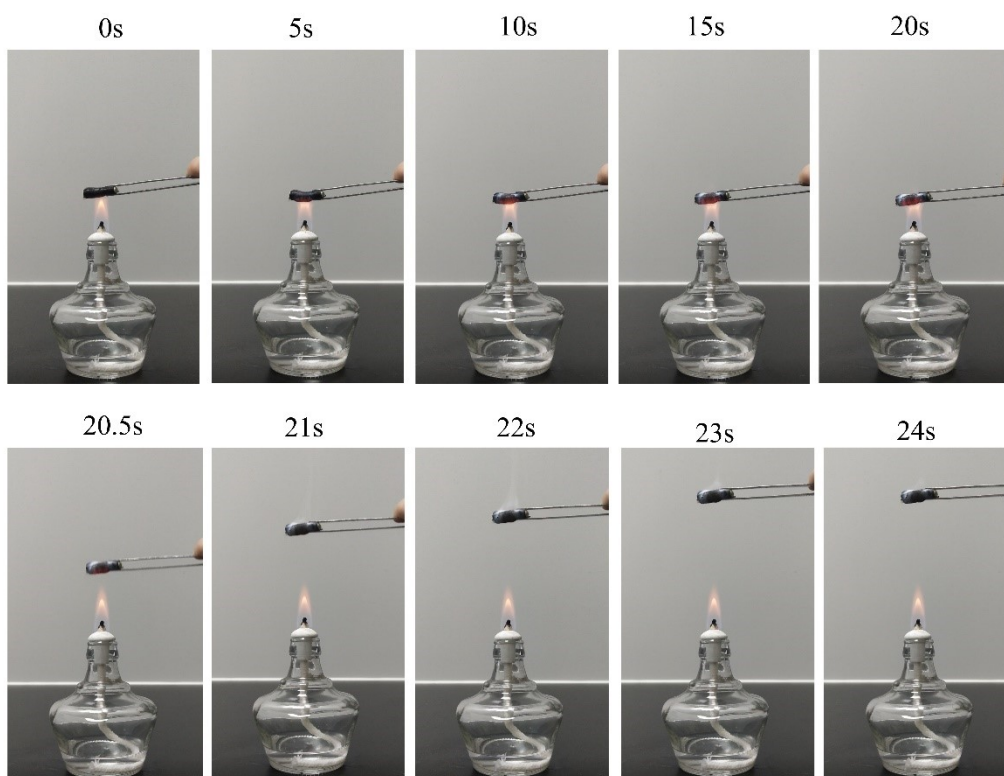

**Fig. S5** Pictures of I-TENG sensor burned on an alcohol lamp for 20s and then self-extinguishing after being removed.

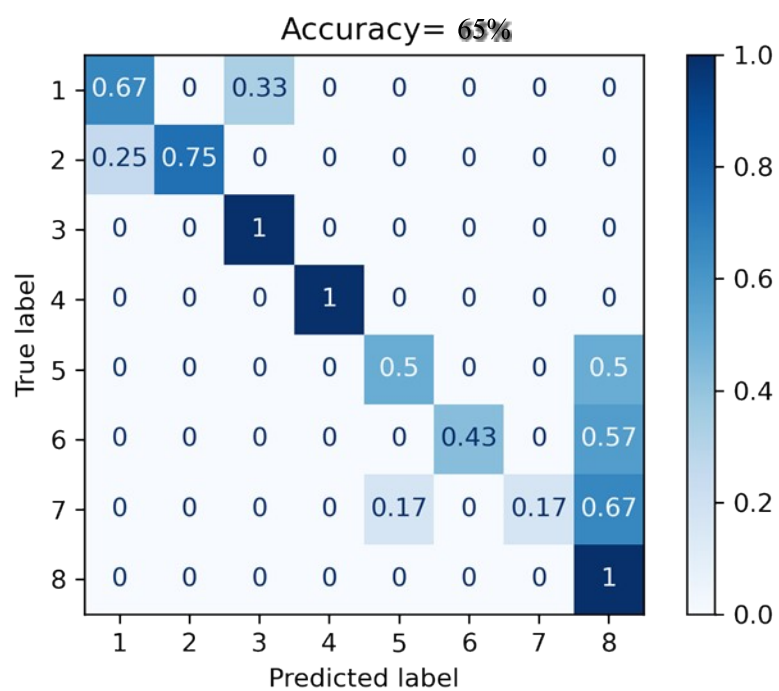

**Fig. S6** Confusion map for machine learning outcome with total data of weights.

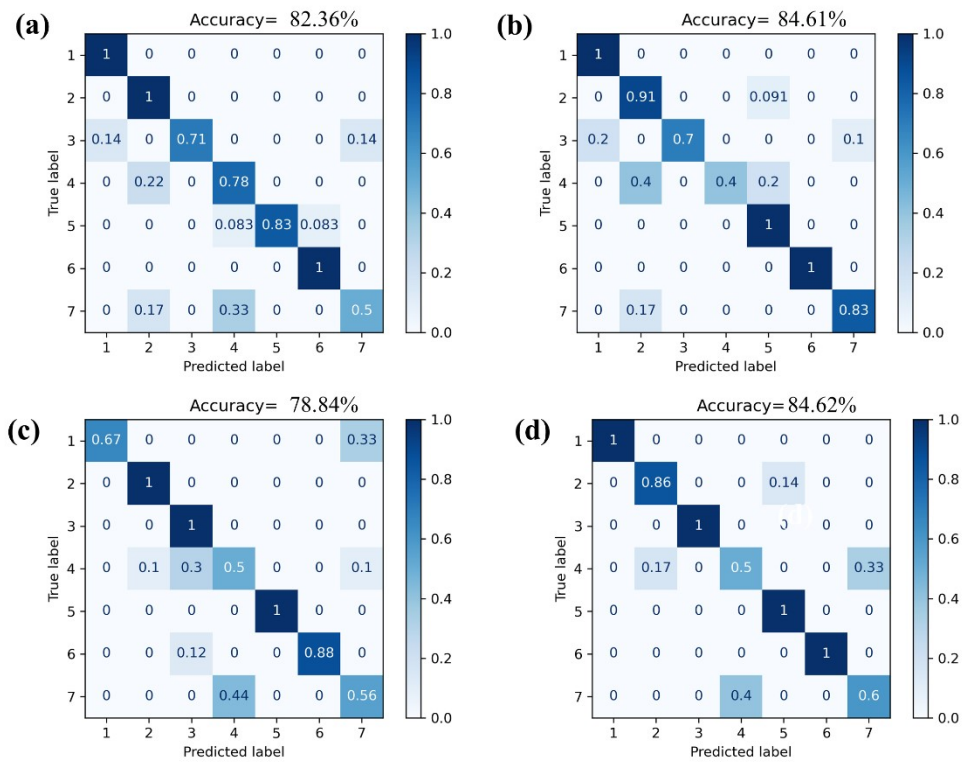

**Fig. S7** Confusion diagram of machine learning results for different object shapes: (a) total data, (b) maximum and mean data, (c) maximum and standard data, and (d) mean and standard data.



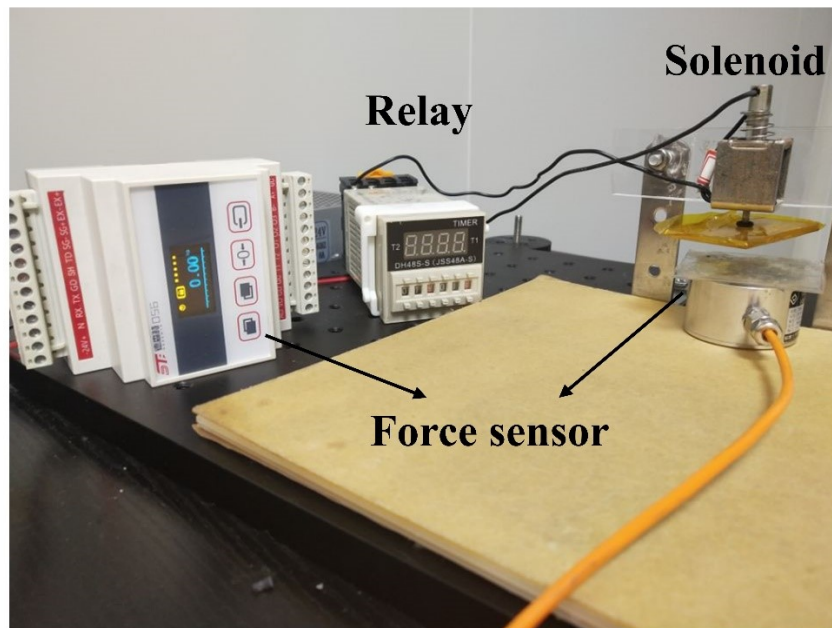

**Fig. S8** The assembled setup to generate the necessary contact-separate process.

Movie S1: Preparation of a 3D-printed patterned silicone sheath.

Movie S2: Conductivity test of the ionogel at different temperatures.

Movie S3: Electric output of I-TENG induced by tapping one finger on hand back with different intensities and speeds.

Movie S4: The catching process of a sand-loaded cup (806g).
